# Supplementary material for: Melamine-assisted synthesis of porous V2O3/N-doped carbon hollow nanospheres for efficient sodium-ion storage
Source: Royal Society of Chemistry journal article supplement (doi:10.1039/d1dt00047k), 2021-01-01
Supplement: d1dt00047k1.pdf [file d1dt00047k1.pdf]

## Supporting Information

### **Melamine-Assisted Synthesis of Porous V<sub>2</sub>O<sub>3</sub>/N-doped Carbon Hollow Nanospheres for Efficient Sodium-Ion Storage**

*Jiixin Yao<sup>a</sup>, Heng Zhang<sup>b</sup>, Zejun Zhao<sup>c</sup>, Zhixiao Zhu<sup>c</sup>, Jialing Yao<sup>a</sup>, Xiaoyan Zheng<sup>\*a</sup>, Yong Yang<sup>\*c</sup>*

<sup>a</sup> Shaanxi Key Laboratory of Degradable Biomedical Materials, Shanxi R&D Center of Biomaterials and Fermentation Engineering, School of Chemical and Engineering, Northwest University, Xian, Shaanxi 710069, China

<sup>b</sup> Xi'an Sunward Aeromat Co., Ltd., No.32, Tuanjie South Road, High-tech Development Zone, Xi'an, Shaanxi 710065, PR China

<sup>c</sup> State Key Laboratory of Solidification Processing, Center of Advanced Lubrication and Seal Materials, Northwestern Polytechnical University, Xi'an, Shaanxi 710072, P. R. China

\*Corresponding author: [zy129@126.com](mailto:zy129@126.com), [yongyangfj@nwpu.edu.cn](mailto:yongyangfj@nwpu.edu.cn)

SI

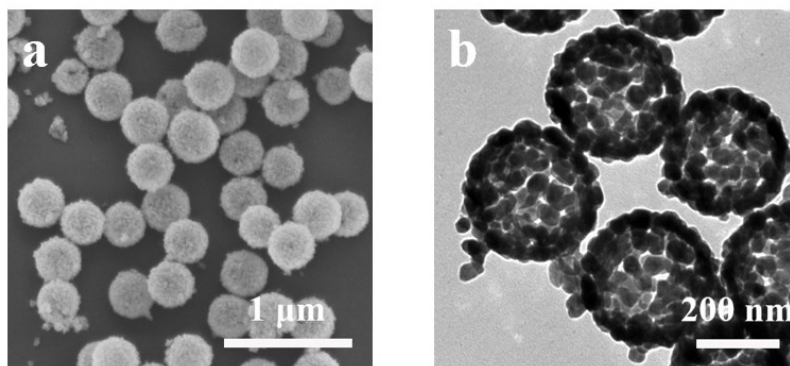

**Figure S1.** (a) SEM and (b) TEM images of V<sub>2</sub>O<sub>3</sub> HSs.

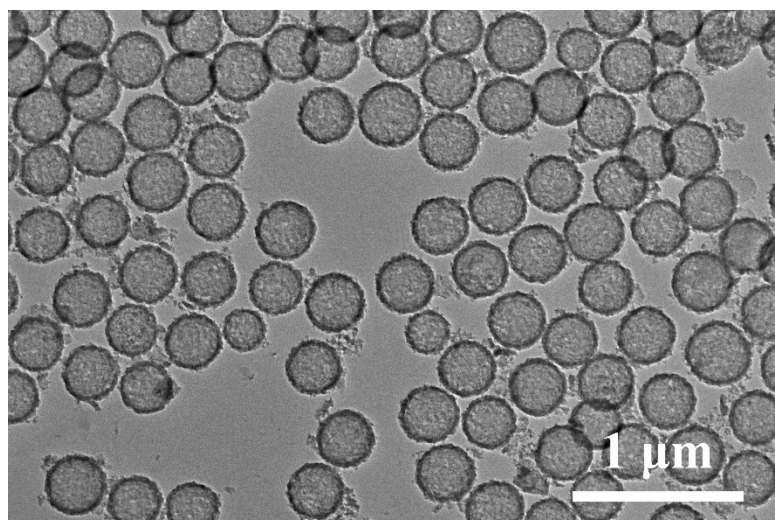

**Figure S2.** TEM image of the M-VOOH HSs.

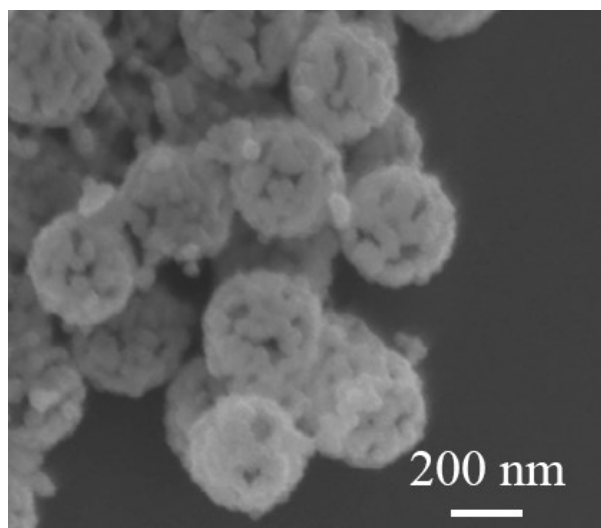

**Figure S3.** SEM image of the V<sub>2</sub>O<sub>3</sub>/NC HSs.

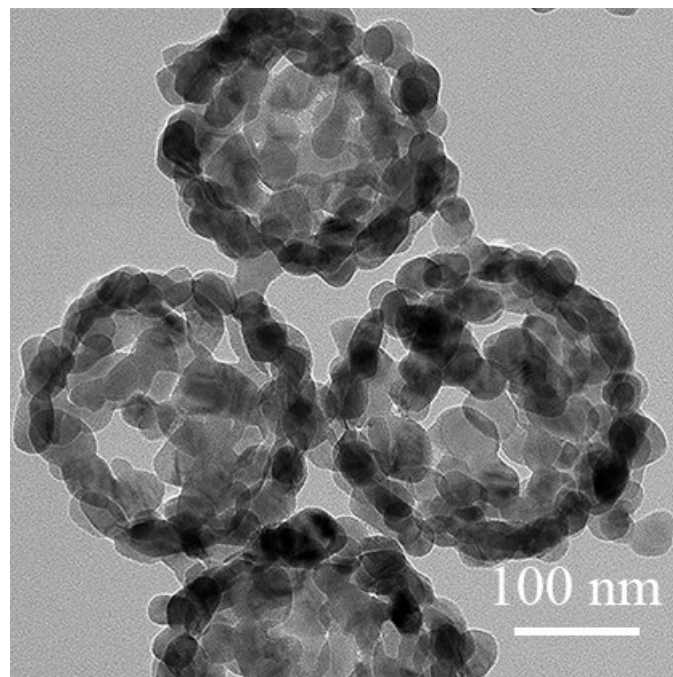

**Figure S4.** TEM image of the V<sub>2</sub>O<sub>3</sub>/NC HSs.

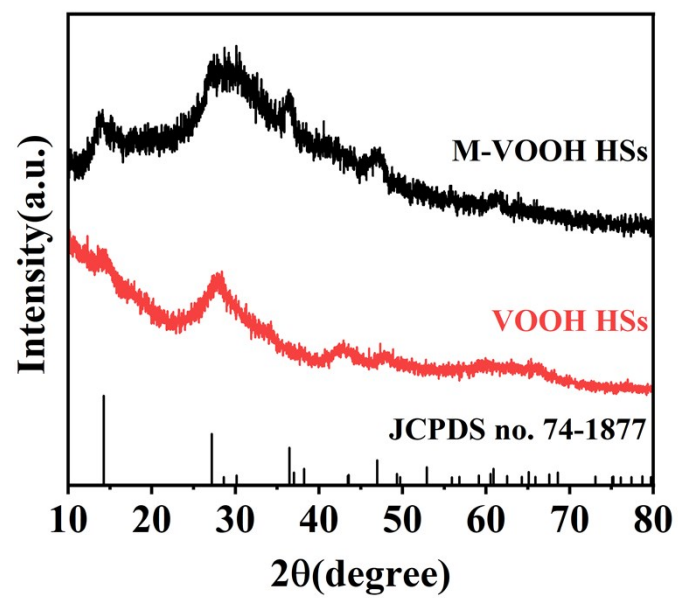

**Figure S5.** The XRD patterns of M-VOOH HSs and VOOH HSs.

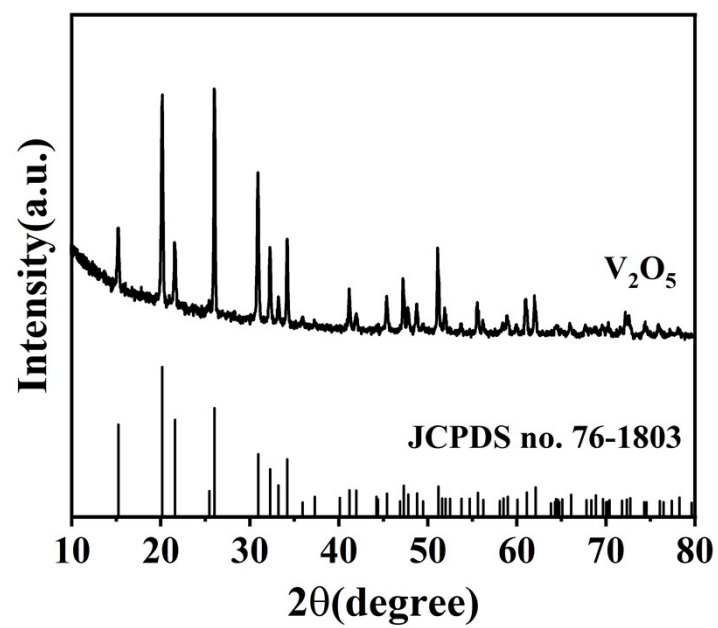

**Figure S6.** The XRD patterns of the remaining sample after TG test.

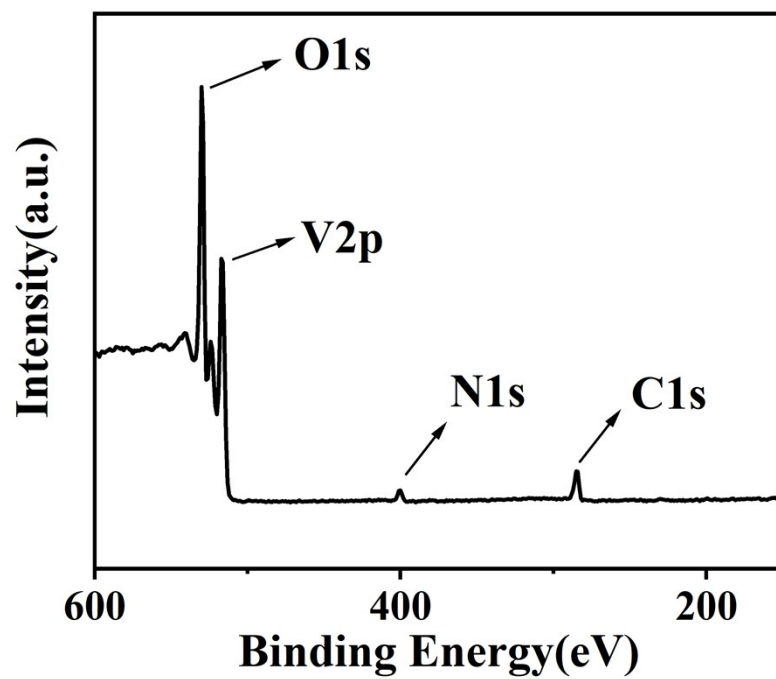

**Figure S7.** XPS full-spectrum analysis of the  $\text{V}_2\text{O}_3/\text{NC}$  HSs.



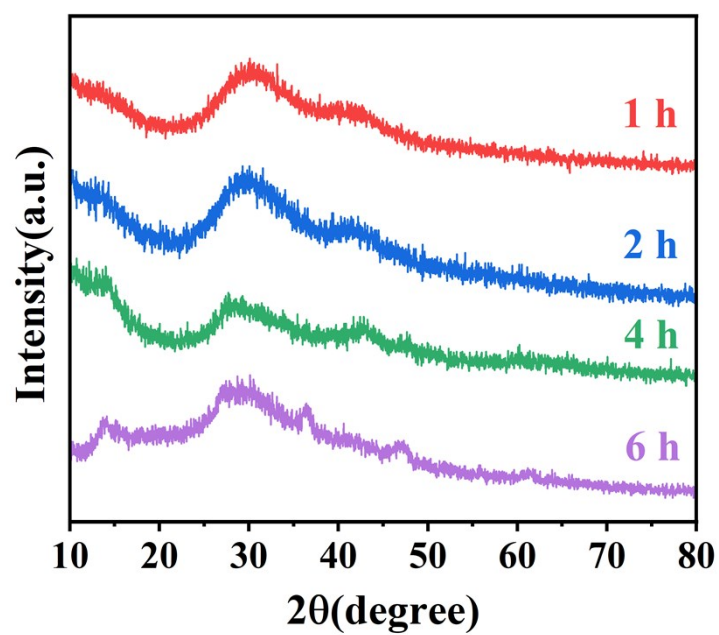

**Figure S8.** The XRD patterns of the products with hydrothermal reaction time of 1h, 2h, 4h and 6h.

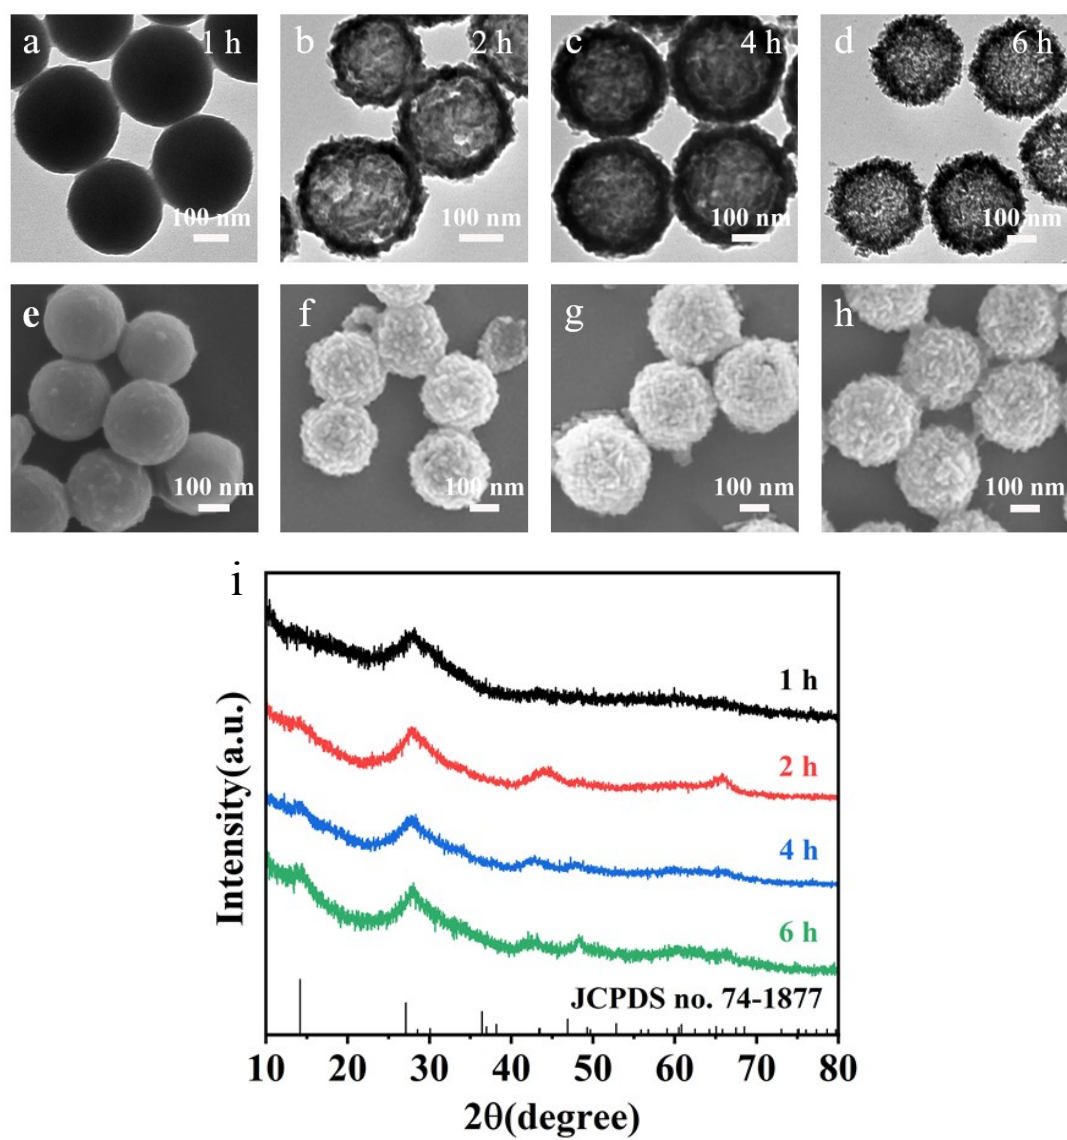

**Figure S9.** (a-d) TEM, (e-h) SEM images and (i) the corresponding XRD patterns of the products without adding melamine at the hydrothermal reaction time of 1h, 2h, 4h and 6h.

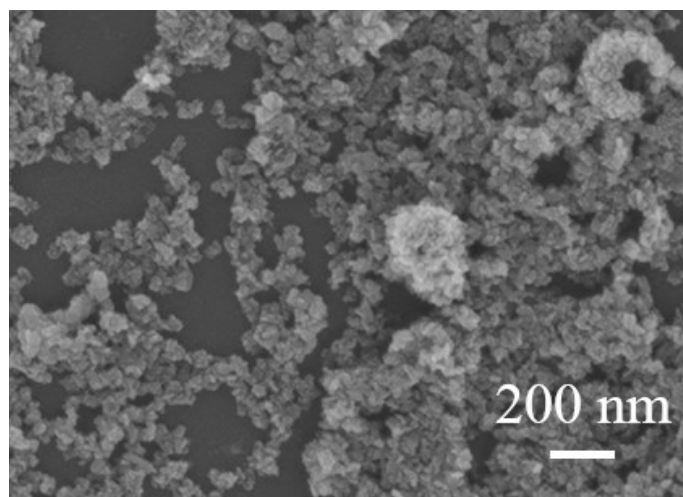

**Figure S10.** SEM image of hydrothermal reaction products at 160 °C for 4 hours, other conditions were the same as the experimental conditions.

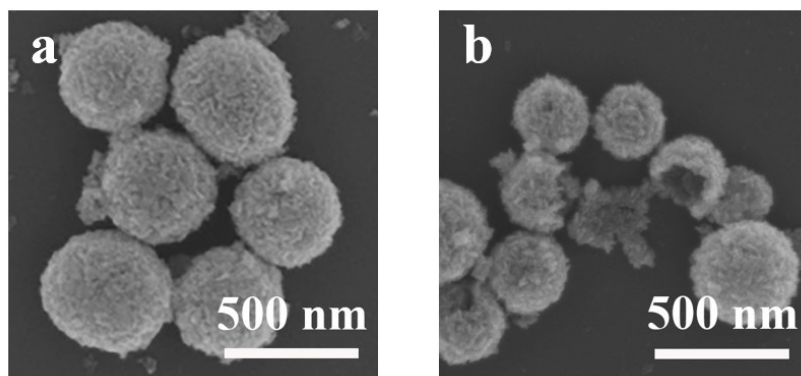

**Figure S11.** SEM images of the hydrothermal reaction products prepared by adding (a) 40 mg and (b) 60 mg melamine.

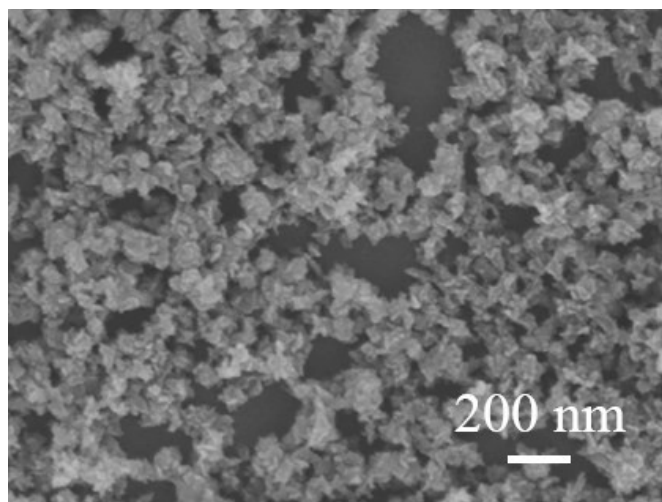

**Figure S12.** SEM image of the sample synthesized with the help of glucose.

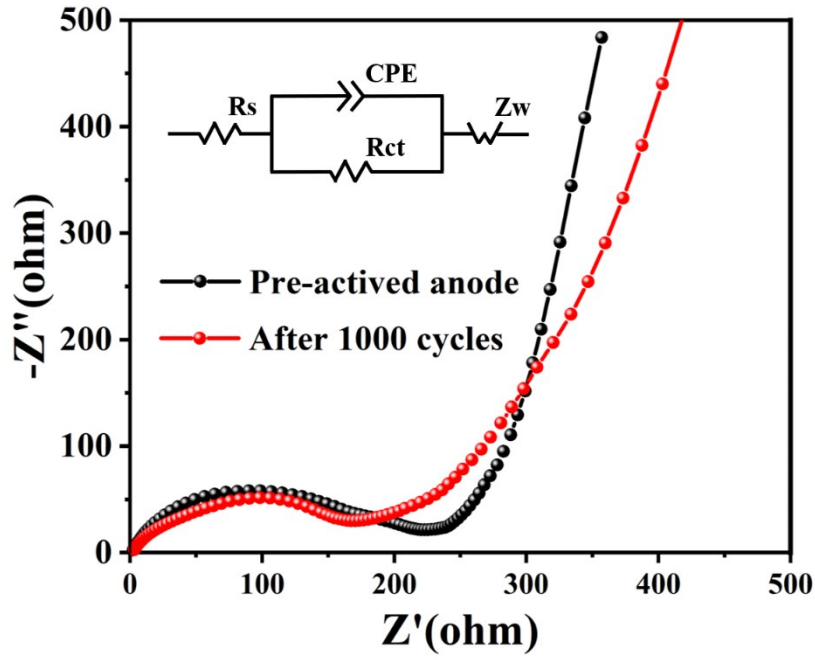

**Figure S13.** The Nyquist plots of  $\text{V}_2\text{O}_3/\text{NC}$  HSs electrode (the illustration shows the equivalent circuit model of the  $\text{V}_2\text{O}_3/\text{NC}$  HSs electrode).

The equivalent circuit model of the  $\text{V}_2\text{O}_3/\text{NC}$  HSs electrode is composed of series resistance ( $R_s$ ), constant phase element (CPE), charge transfer resistance ( $R_{ct}$ ) and Warburg impedance ( $Z_w$ ) element.

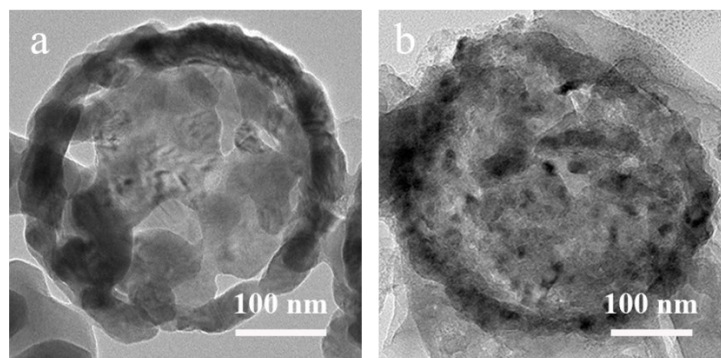

**Figure S14.** TEM images of  $\text{V}_2\text{O}_3/\text{NC}$  HSs (a) before 1000 cycles, (b) after 1000 cycles.

It can be seen that  $\text{V}_2\text{O}_3/\text{NC}$  HSs still maintain their original hollow sphere structure after 1000 cycles. It was further confirmed that  $\text{V}_2\text{O}_3/\text{NC}$  HSs showed excellent mechanical properties and could resist large volume changes caused by sodium insertion/extraction during the cycle.

**Table S1.** In this work and previous research, the performance of batteries using V<sub>2</sub>O<sub>3</sub>-based materials as SIBs anodes is compared.

| V <sub>2</sub> O <sub>3</sub> -based anode materials       | Synthesis method                                                           | Rate performance (mAh g <sup>-1</sup> )                                 | Cycle performance (mAh g <sup>-1</sup> )                                           | Reference        |
|------------------------------------------------------------|----------------------------------------------------------------------------|-------------------------------------------------------------------------|------------------------------------------------------------------------------------|------------------|
| <b>V<sub>2</sub>O<sub>3</sub>/NC HSs</b>                   | <b>hydrothermal method</b>                                                 | <b>395.4 (0.05 A g<sup>-1</sup>)</b><br><b>277 (1 A g<sup>-1</sup>)</b> | <b>263.8</b><br><b>(1 A g<sup>-1</sup>, 1000 cycles)</b>                           | <b>this work</b> |
| V <sub>2</sub> O <sub>3</sub> /NG nanobelt                 | low-temperature hydrothermal method                                        | 193 (100 mA g <sup>-1</sup> )<br>130 (1000 mA g <sup>-1</sup> )         | 154<br>(500 mA g <sup>-1</sup> , 500 cycles)                                       | 1                |
| V <sub>2</sub> O <sub>3</sub> /C-NTs@rGO                   | the cetylamine-assisted self-scrolling method<br>electrostatic interaction | 165 (20 A g <sup>-1</sup> )                                             | 175<br>(5 A g <sup>-1</sup> , 15000 cycles)                                        | 2                |
| V <sub>2</sub> O <sub>3</sub> @rGO                         | hydrothermal protocol                                                      |                                                                         |                                                                                    | 3                |
| GF+ V <sub>2</sub> O <sub>3</sub> /CNTs                    | solvothermal method<br>chemical vapor deposition                           | 612 (0.1 A g <sup>-1</sup> )<br>462 (10 A g <sup>-1</sup> )             | 402(2 A g <sup>-1</sup> , 6000 cycles)<br>134(10 A g <sup>-1</sup> , 10000 cycles) | 4                |
| GF+ V <sub>2</sub> O <sub>3</sub>                          | solvothermal method<br>chemical vapor deposition                           | 411 (0.1 A g <sup>-1</sup> )<br>23 (10 A g <sup>-1</sup> )              | 115(2 A g <sup>-1</sup> , 6000 cycles)                                             | 4                |
| V <sub>2</sub> O <sub>3</sub> /C composite                 | sequential self-template mechanism                                         | 216 (100 mA g <sup>-1</sup> )<br>176 (1000 mA g <sup>-1</sup> )         | 173<br>(1000 mA g <sup>-1</sup> , 2000cycles)                                      | 5                |
| V <sub>2</sub> O <sub>3</sub> porous nanotubes             | reduction process                                                          | 284 (100 mA g <sup>-1</sup> )<br>167 (1000 mA g <sup>-1</sup> )         | 90<br>(2000 mA g <sup>-1</sup> , 5300cycles)                                       | 6                |
| porous V <sub>2</sub> O <sub>3</sub> /carbon nanocomposite | hydrothermal approach                                                      | 270.8 (100 mA g <sup>-1</sup> )                                         | 145<br>(1000 mA g <sup>-1</sup> , 1000 cycles)                                     | 7                |
| porous shuttle-like V <sub>2</sub> O <sub>3</sub> /C       | self-template approach                                                     | 242 (100 mA g <sup>-1</sup> )                                           | 133<br>(2000 mA g <sup>-1</sup> , 1000 cycles)                                     | 8                |



## REFERENCES

- [1] J. Zhang, Q. Li, Z. Liao, L. Wang, J. Xu, X. Ren, B. Gao, P. K. Chu and K. Huo, *ChemElectroChem*, 2018, **5**, 1387-1393.
- [2] S. Tan, Y. Jiang, Q. Wei, Q. Huang, Y. Dai, F. Xiong, Q. Li, Q. An, X. Xu, Z. Zhu, X. Bai and L. Mai, *Adv. Mater.*, 2018, **30**, 170712.
- [3] X. Liu, S. Depaifve, T. Leyssens, S. Hermans and A. Vlad, *Batteries & Supercaps*, 2019, **2**, 1016-1025.
- [4] X. Xia, D. Chao, Y. Zhang, J. Zhan, Y. Zhong, X. Wang, Y. Wang, Z. X. Shen, J. Tu and H. Jin Fan, *Small*, 2016, **12**, 3048-3058.
- [5] Y. Li, S. Zhang, S. Wang, J. Leng, C. Jiang, X. Ren, Z. Zhang, Y. Yang and Z. Tang, *J. Mater. Chem. A*, 2019, **7**, 19234-19240.
- [6] A. Sarkar, A. K. Sinha and S. Mitra, *Electrochim. Acta*, 2019, **299**, 914-925.
- [7] X. An, H. Yang, Y. Wang, Y. Tang, S. Liang, A. Pan and G. Cao, *Sci. China Mater.*, 2017, **60**, 717-727.
- [8] Y. Cai, G. Fang, J. Zhou, S. Liu, Z. Luo, A. Pan, G. Cao and S. Liang, *Nano Res.*, 2018, **11**, 449-463.
